# Supplementary material for: A rapid and improved method for the determination of ethyl carbamate in foodstuffs of different matrices
Source: Royal Society of Chemistry journal article supplement (doi:10.1039/d4ay00643g), 2024-01-01
Supplement: d4ay00643g1.pdf [file d4ay00643g1.pdf]

# SUPPLEMENTARY MATERIALS

**A rapid and improved method for the determination of ethyl carbamate  
in foodstuffs of different matrices**

Veronika Šantrůčková,<sup>a</sup> Jan Fischer<sup>a</sup> and Jitka Klikarová<sup>\*a</sup>

**FIGURES:**

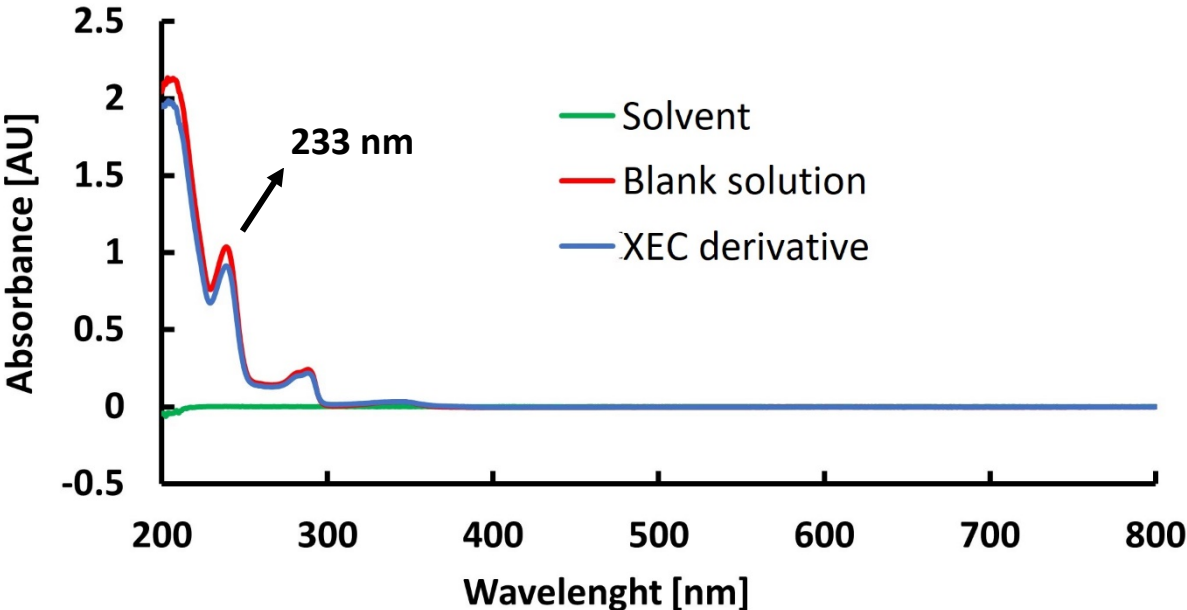

Figure S1 UV/VIS spectra of solvent (40% EtOH), blank solution (derivatization mixture without analyte), and XEC derivative.

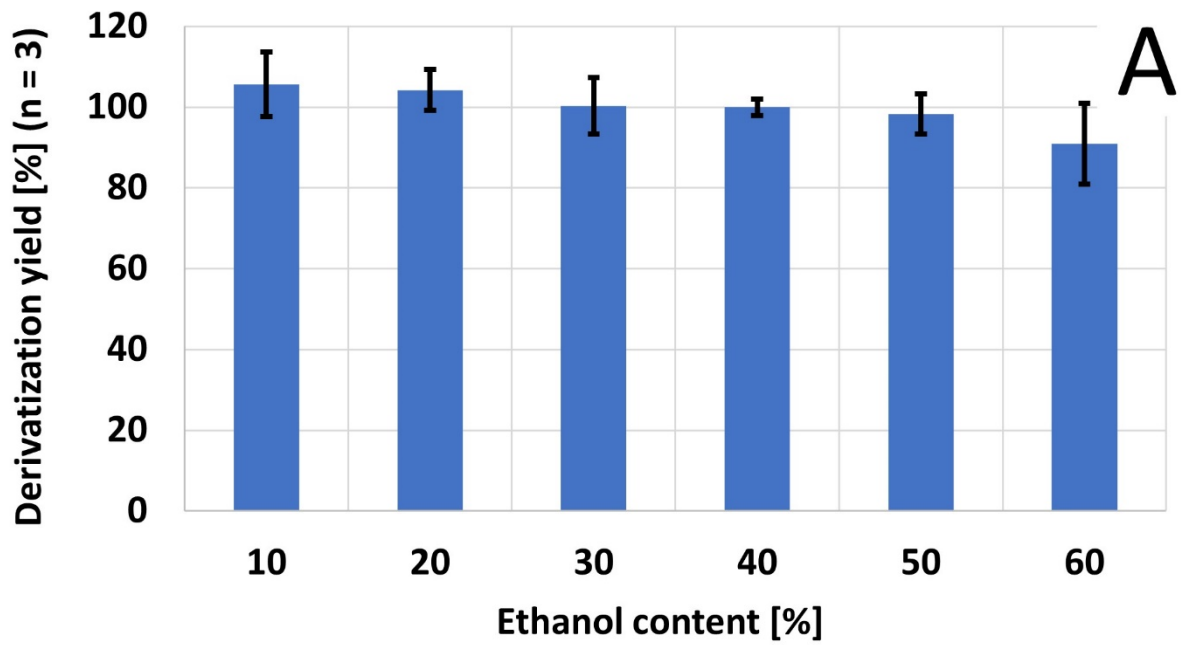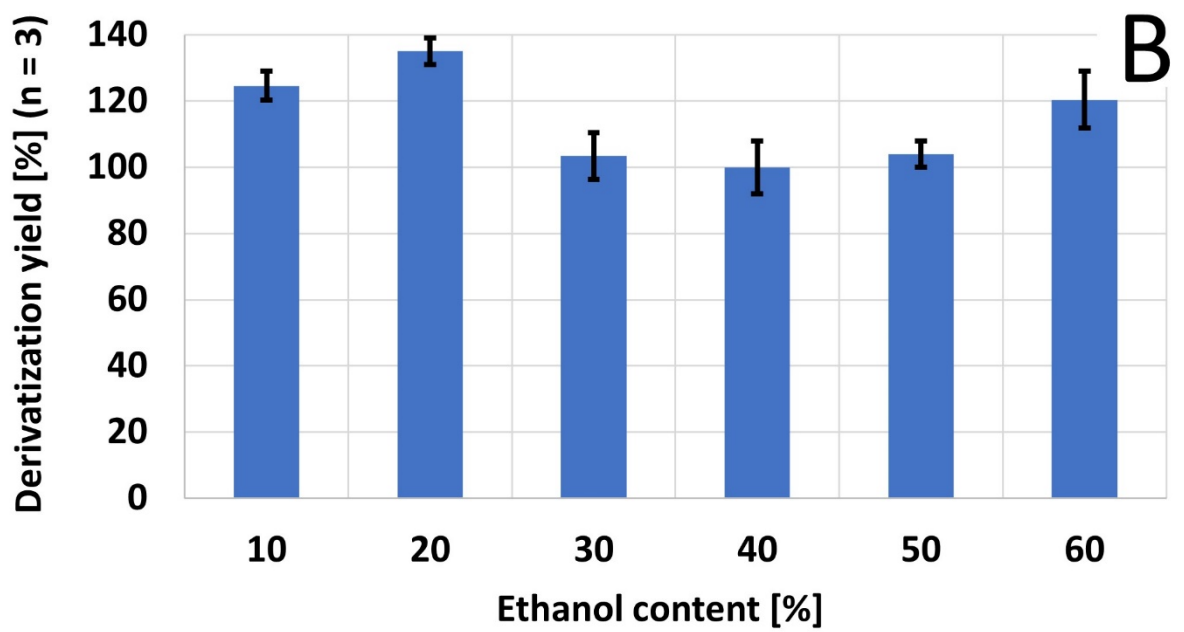

Figure S2 Dependence of derivatization yield on the concentration of ethanol in a standard solution with a concentration of 1300 µg L<sup>-1</sup> EC (A) and in a real sample of plum spirit (B).

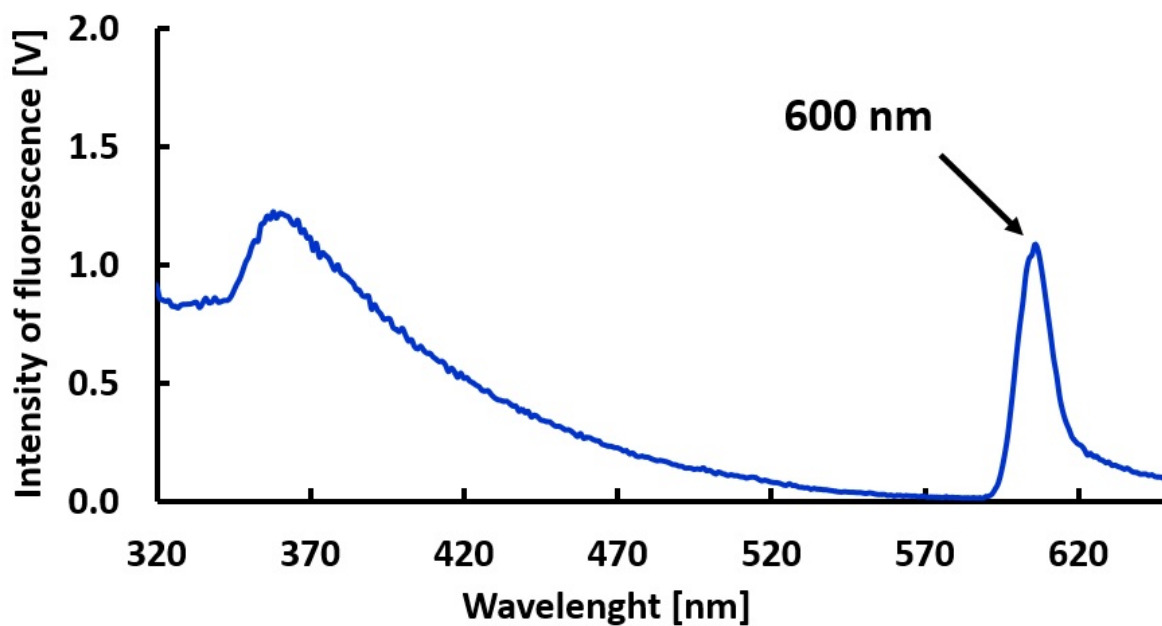

Figure S3 Emission spectrum of the XEC derivative measured at  $\lambda_{EX} = 233$  nm.

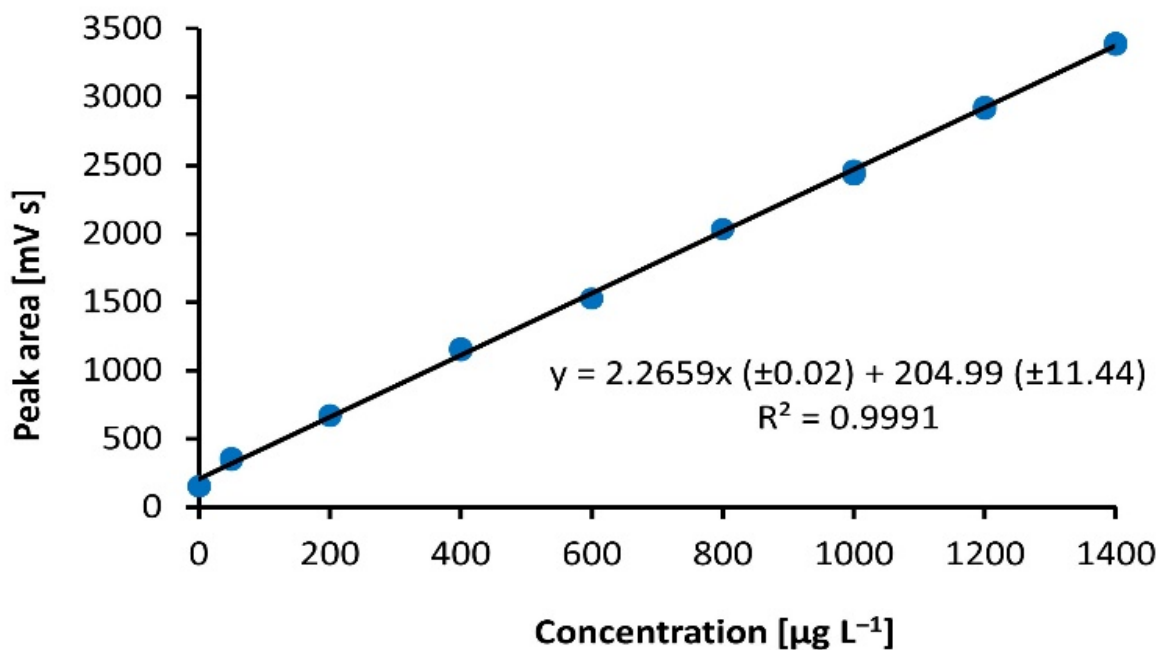

Figure S4 Calibration dependence including regression equation (with corresponding standard deviations) and coefficient of determination.

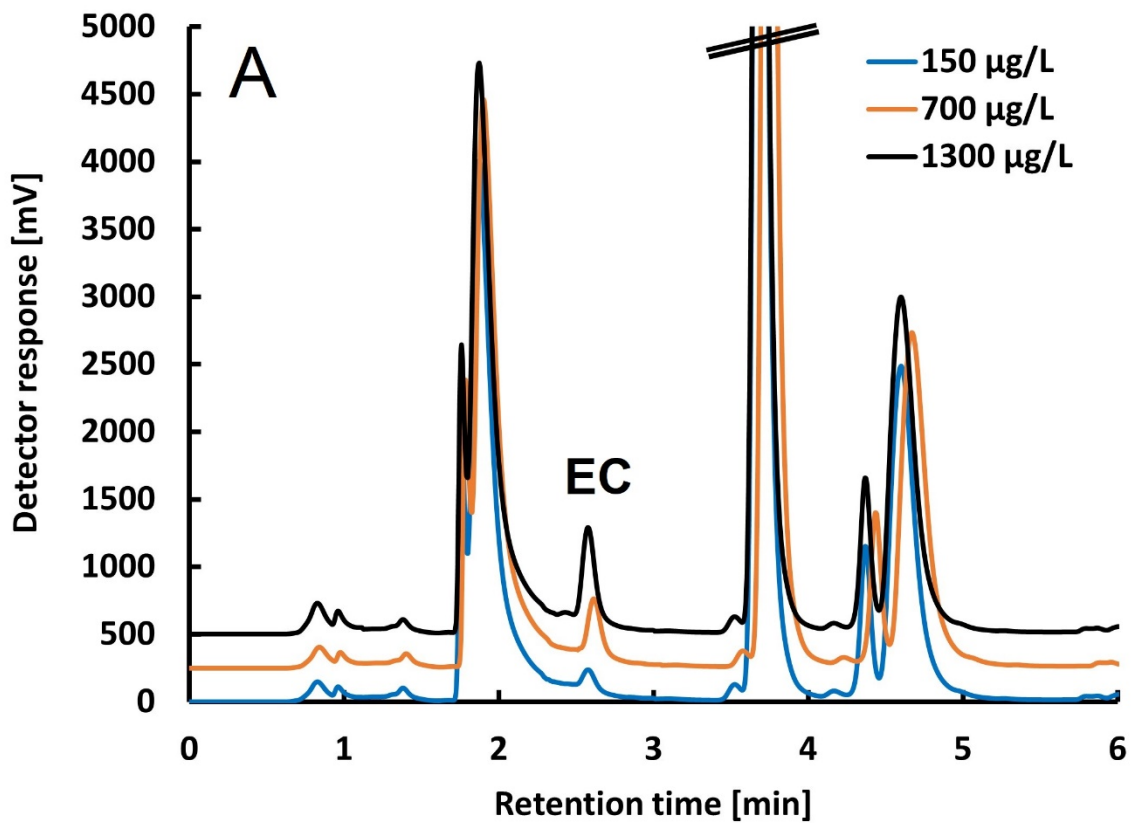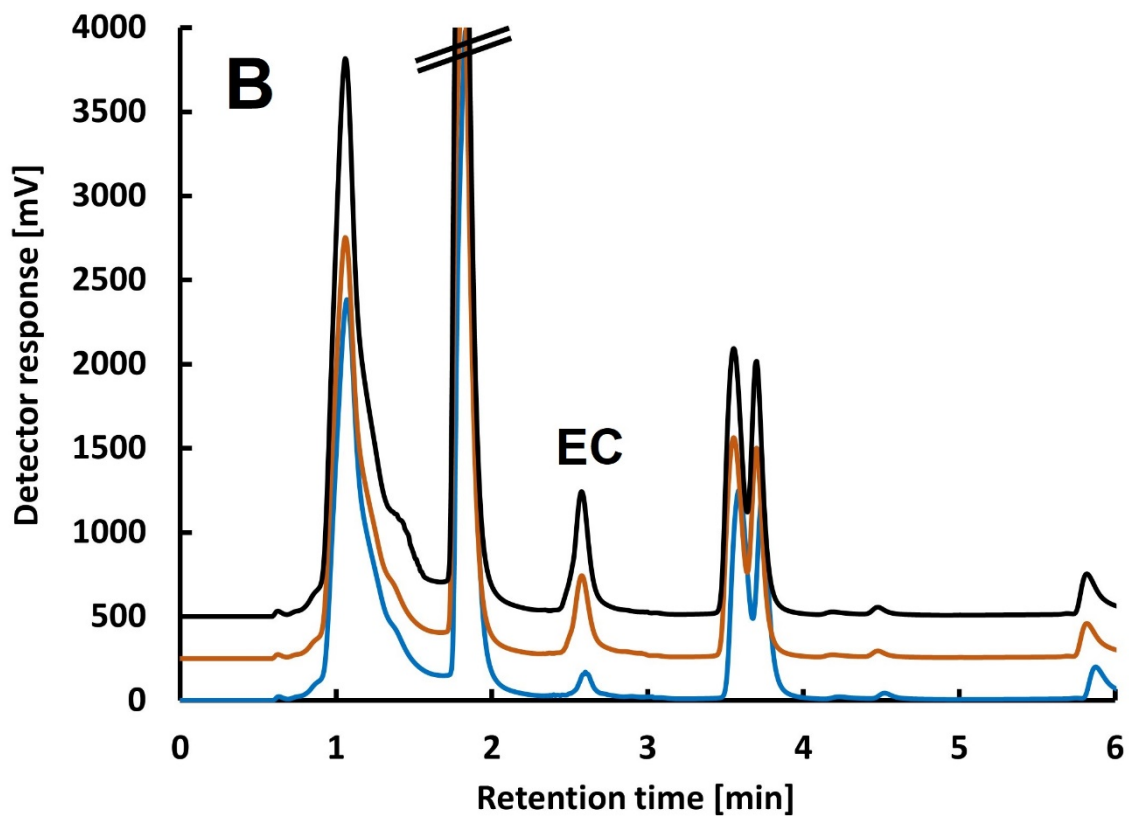

Figure S5 Chromatographic separation of spiked soy sauce sample No. 47 (A) and vinegar sample No. 48 (B). The spiked concentration of EC corresponds to 150 (blue line), 700 (orange line), and 1300  $\mu\text{g L}^{-1}$  (black line) in both cases.

## TABLES

Table S1 Data for calculation of recovery ( $n = 5$ ).

| <b>Plum spirit</b>                                                |                                    |                                                                              |                                  |
|-------------------------------------------------------------------|------------------------------------|------------------------------------------------------------------------------|----------------------------------|
| <b>Spiked concentration<br/>[<math>\mu\text{g L}^{-1}</math>]</b> | <b>Average of peak area [mV s]</b> | <b>Average of calculated concentration [<math>\mu\text{g L}^{-1}</math>]</b> | <b>Recovery [%]</b>              |
| 150                                                               | 515                                | 137.0                                                                        | <b>91.3 <math>\pm</math> 4.8</b> |
| 700                                                               | 1554                               | 589.6                                                                        | <b>84.2 <math>\pm</math> 2.1</b> |
| 1300                                                              | 3004                               | 1235.4                                                                       | <b>95.0 <math>\pm</math> 0.8</b> |

  

| <b>Soy sauce</b>                                                  |                                    |                                                                              |                                   |
|-------------------------------------------------------------------|------------------------------------|------------------------------------------------------------------------------|-----------------------------------|
| <b>Spiked concentration<br/>[<math>\mu\text{g L}^{-1}</math>]</b> | <b>Average of peak area [mV s]</b> | <b>Average of calculated concentration [<math>\mu\text{g L}^{-1}</math>]</b> | <b>Recovery [%]</b>               |
| 150                                                               | 495                                | 128.2                                                                        | <b>90.8 <math>\pm</math> 2.8</b>  |
| 700                                                               | 1861                               | 731.6                                                                        | <b>103.9 <math>\pm</math> 3.1</b> |
| 1300                                                              | 3266                               | 1351.1                                                                       | <b>103.7 <math>\pm</math> 1.9</b> |

  

| <b>Vinegar</b>                                                    |                                    |                                                                              |                                   |
|-------------------------------------------------------------------|------------------------------------|------------------------------------------------------------------------------|-----------------------------------|
| <b>Spiked concentration<br/>[<math>\mu\text{g L}^{-1}</math>]</b> | <b>Average of peak area [mV s]</b> | <b>Average of calculated concentration [<math>\mu\text{g L}^{-1}</math>]</b> | <b>Recovery [%]</b>               |
| 150                                                               | 572                                | 162.0                                                                        | <b>103.2 <math>\pm</math> 3.1</b> |
| 700                                                               | 1763                               | 687.6                                                                        | <b>96.5 <math>\pm</math> 2.6</b>  |
| 1300                                                              | 3268                               | 1351.8                                                                       | <b>103.6 <math>\pm</math> 1.8</b> |

Table S2 Data for calculation of intra-day and inter-day repeatability.

| Number of measurements | Intra-day repeatability |                  |                                        | Inter-day repeatability |                  |                                        |
|------------------------|-------------------------|------------------|----------------------------------------|-------------------------|------------------|----------------------------------------|
|                        | Retention time [min]    | Peak area [mV s] | Concentration [ $\mu\text{g L}^{-1}$ ] | Retention time [min]    | Peak area [mV s] | Concentration [ $\mu\text{g L}^{-1}$ ] |
| 1                      | 2.58                    | 3164             | 1307                                   | 2.61                    | 3523             | 1467                                   |
| 2                      | 2.58                    | 3169             | 1309                                   | 2.59                    | 3227             | 1335                                   |
| 3                      | 2.58                    | 3283             | 1360                                   | 2.61                    | 3561             | 1484                                   |
| 4                      | 2.58                    | 3485             | 1450                                   | 2.59                    | 3301             | 1368                                   |
| 5                      | 2.58                    | 3537             | 1473                                   | 2.58                    | 3827             | 1603                                   |
| 6                      | —                       | —                | —                                      | 2.58                    | 3536             | 1473                                   |
| <b>Average</b>         | 2.58                    | 3327             | 1380                                   | 2.59                    | 3496             | 1455                                   |
| <b>SD</b>              | 0                       | 175              | 78                                     | 0.01                    | 212.8            | 95.1                                   |
| <b>RSD [%]</b>         | <b>0.02</b>             | <b>5.3</b>       | <b>5.7</b>                             | <b>0.54</b>             | <b>6.1</b>       | <b>6.5</b>                             |
